# Supplementary material
Source: PubMed Central journal article supplement (PMC5579361)
Supplement: EMBR-18-1586-s002.pdf [file EMBR-18-1586-s002.pdf]

## Expanded View Figures

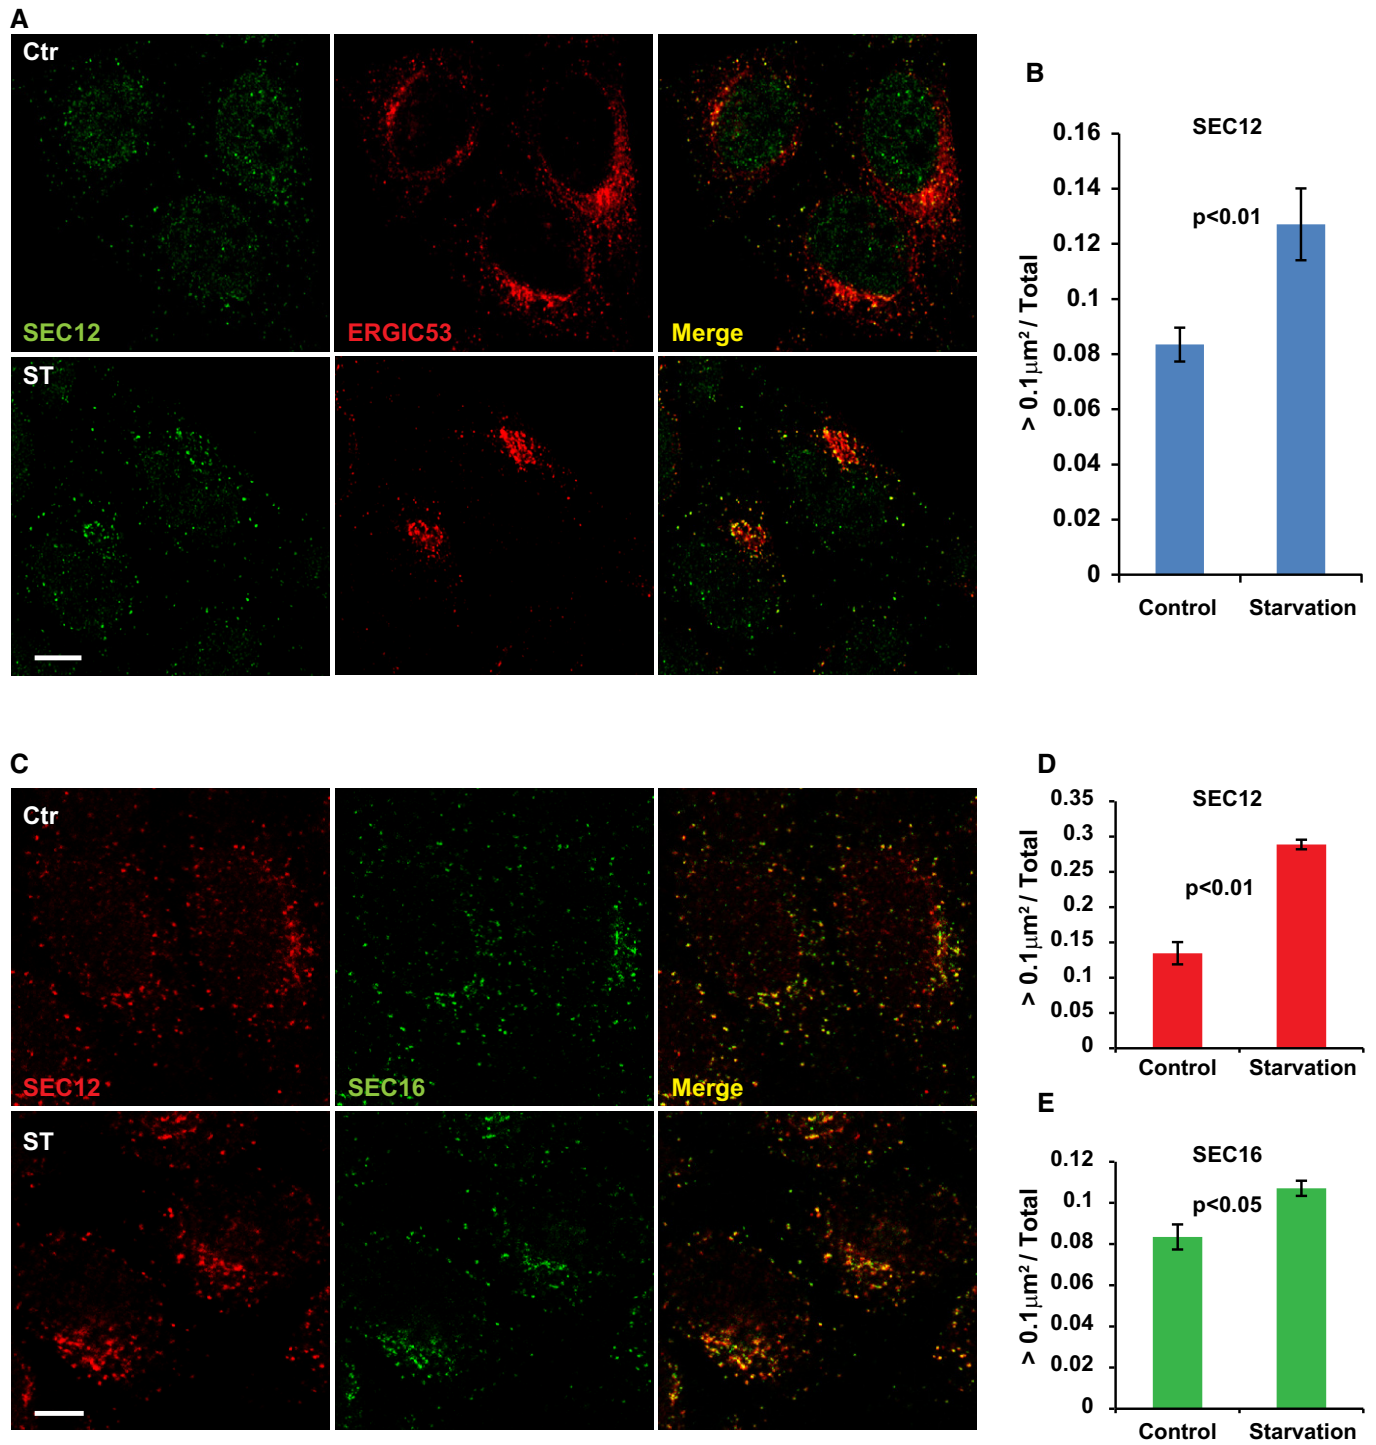

Figure EV1.

**Figure EV1. Enlargement of SEC12-positive compartment upon starvation.**

- A HeLa cells were incubated in nutrient-rich medium (Ctr) or starved in EBSS (ST) for 1 h. Immunofluorescence and confocal microscopy were performed to visualize SEC12 and ERGIC53. Scale bar: 10  $\mu\text{m}$
- B Quantification of the fraction of SEC12 compartments larger than 0.1  $\mu\text{m}^2$  in area analyzed in (A). Error bars represent standard deviations. *P*-value was obtained from two-tailed *t*-test. Five experiments (50–100 cells/experiment) were performed for the statistics.
- C HeLa cells were incubated in nutrient-rich medium (Ctr) or starved in EBSS (ST) for 1 h. Immunofluorescence and confocal microscopy were performed to visualize SEC12 and SEC16 compartments. Scale bar: 10  $\mu\text{m}$
- D Quantification of the percentage of SEC12 compartments larger than 0.1  $\mu\text{m}^2$  in area analyzed in (C). Error bars represent standard deviations. *P*-value was obtained from two-tailed *t*-test. Five experiments (50–100 cells/experiment) were performed for the statistics.
- E Quantification of the percentage of SEC16 compartments larger than 0.1  $\mu\text{m}^2$  in area analyzed in (C). Error bars represent standard deviations. *P*-value was obtained from two-tailed *t*-test. Five experiments (50–100 cells/experiment) were performed for the statistics.

**Figure EV2. PI3K is not required for the starvation-induced enlargement of SEC12 compartment.**

- A HeLa cells were incubated in nutrient-rich medium (Ctr) or starved in EBSS (ST) with control, wortmannin (10 nM) or 3-methyladenine (3-MA, 10 mM) for 1 h. Immunofluorescence and confocal microscopy were performed to visualize SEC12 compartments. Scale bar: 10  $\mu\text{m}$
- B Quantification of the fraction of SEC12 compartments larger than 0.1  $\mu\text{m}^2$  in area analyzed in (A). Error bars represent standard deviations. *P*-value was obtained from two-tailed *t*-test. Five experiments (50–100 cells/experiment) were performed for the statistics.
- C HeLa cells were incubated in nutrient-rich medium (Ctr) or starved in EBSS (ST) with control, PIK-III, SAR405, or VPS34-IN1 (20  $\mu\text{M}$  each) for 1 h. Immunofluorescence and confocal microscopy were performed to visualize SEC12 compartments. Scale bar: 10  $\mu\text{m}$
- D Quantification of the fraction of SEC12 compartments larger than 0.1  $\mu\text{m}^2$  in area analyzed in (C). Error bars represent standard deviations. *P*-value was obtained from two-tailed *t*-test. Five experiments (50–100 cells/experiment) were performed for the statistics.

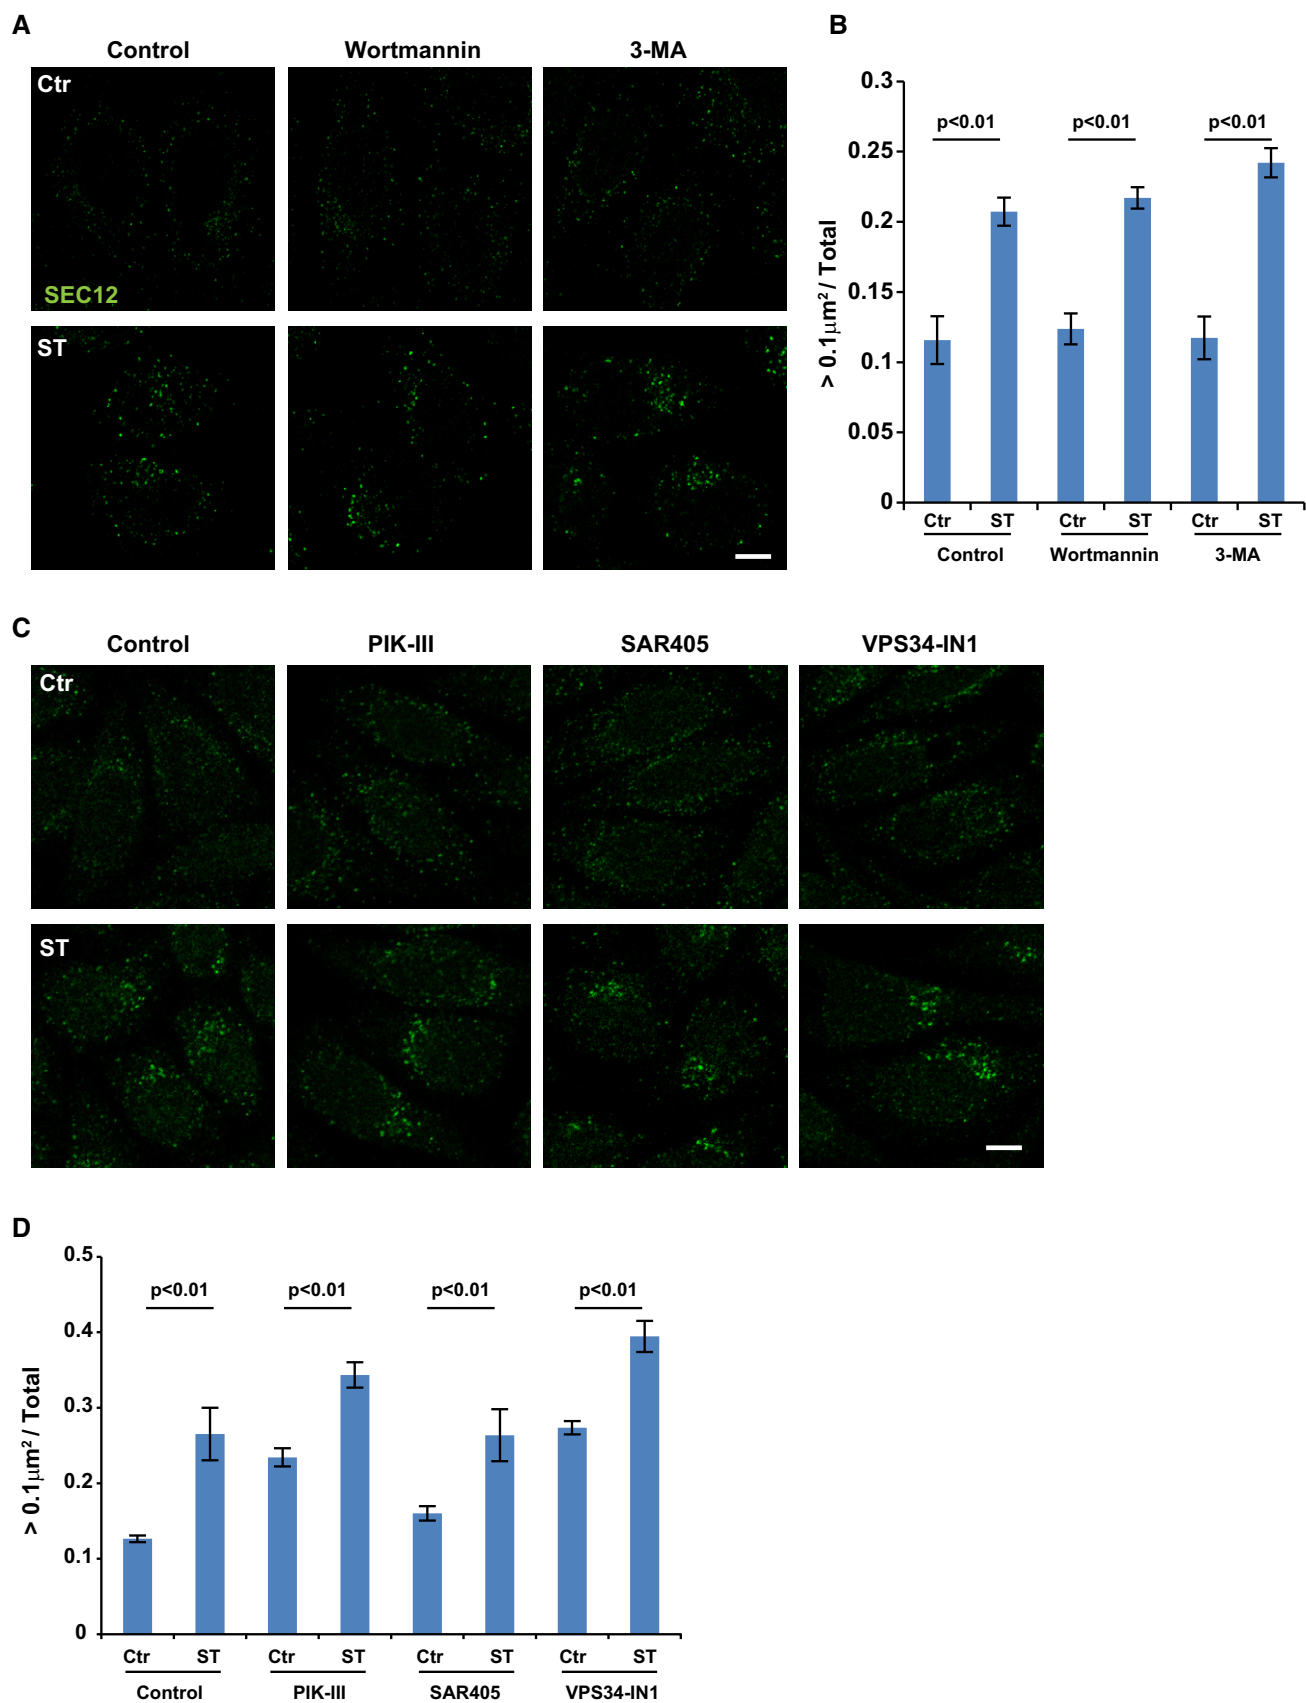

Figure EV2.

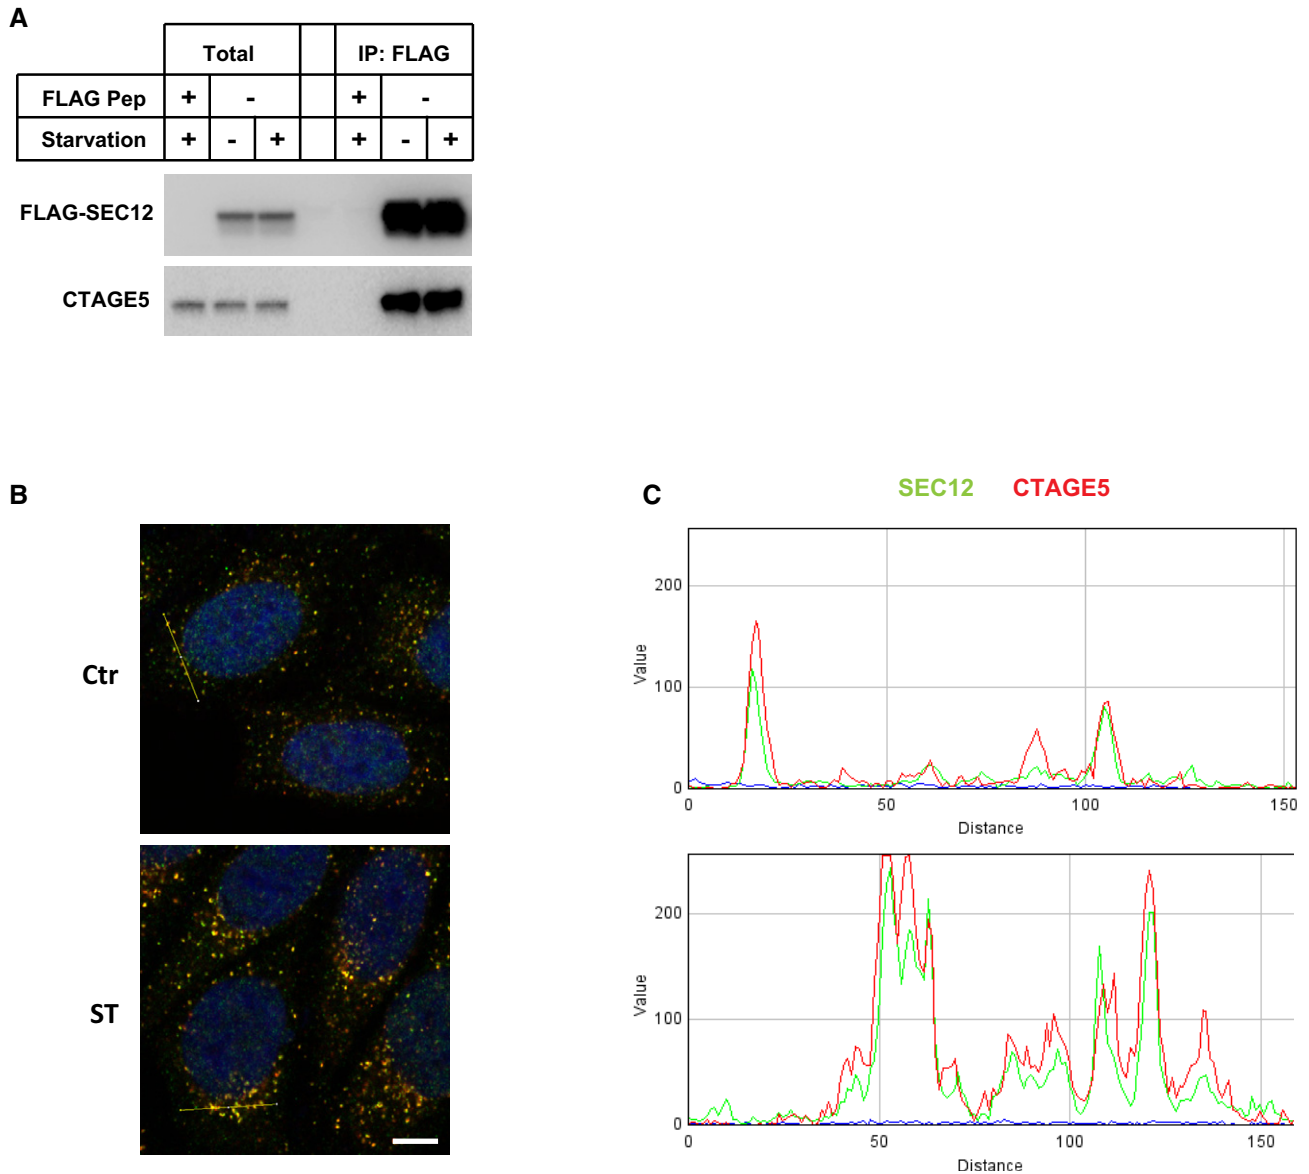

**Figure EV3. Analysis of SEC12 and CTAGE5 colocalization and requirement of CTAGE5 for LC3 lipidation.**

- A HEK293T cells were transfected with control plasmids or plasmids encoding FLAG-SEC12. After 24 h, the cells were incubated in nutrient-rich medium or starved in EBSS for 1 h. Immunoprecipitation of FLAG-SEC12 was performed, and the levels of indicated proteins from indicated fractions were determined by immunoblot.
- B, C RGB profile plots showing the colocalization of SEC12 (green) and CTAGE5 (red) through the lines drawn on the merged images shown in Fig 2A (yellow lines in panel B).

**Figure EV4. Blue Native-PAGE analysis of the TANGO1-CTAGE5-SEC12 complex.**

HeLa cells were incubated in nutrient-rich medium or starved in EBSS for 1 h in the absence or presence of 20 nM wortmannin. Cells were lysed, and Blue Native-PAGE was performed to separate protein complexes. SDS-PAGE and immunoblot were followed to determine the migration of the indicated proteins in the Blue Native-PAGE gel. Triangles point to indicate the respective protein bands.

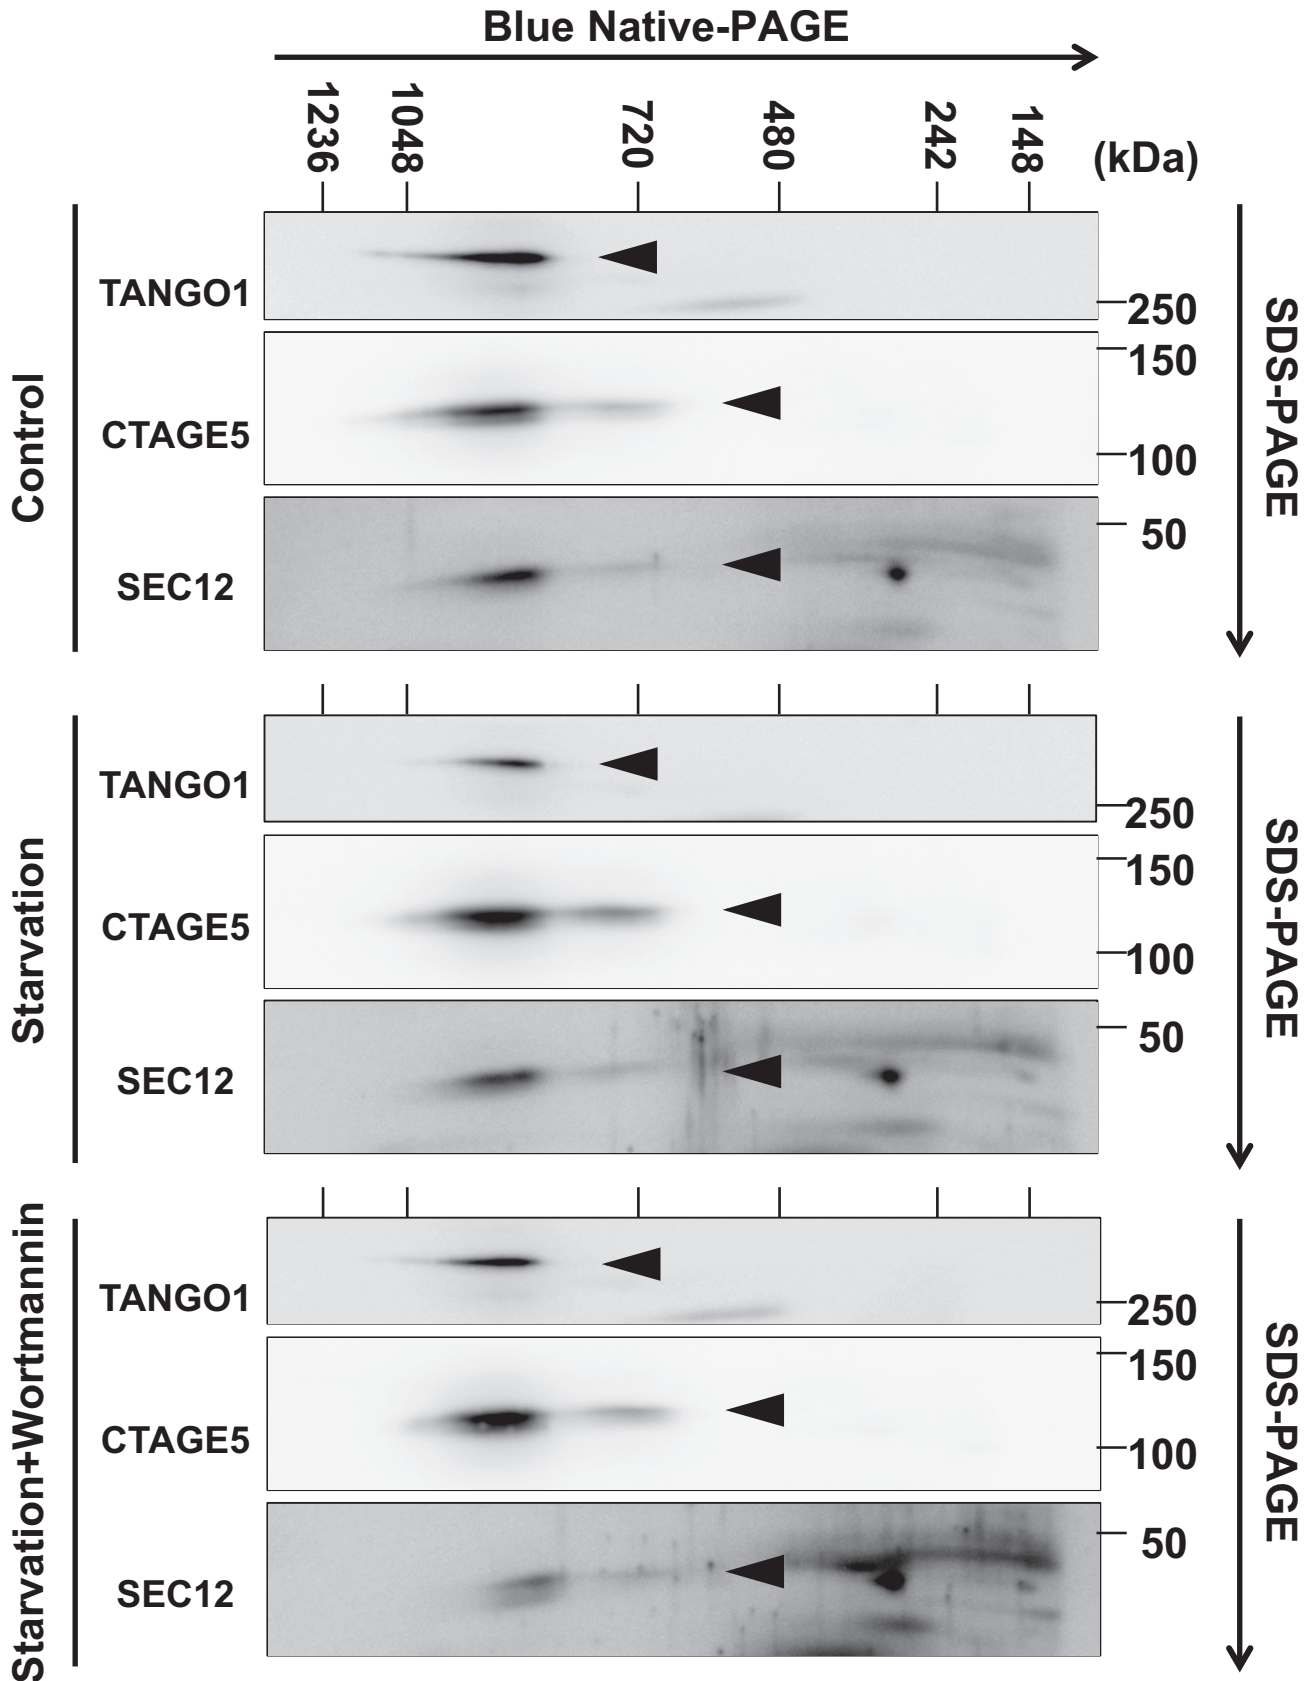

Figure EV4.

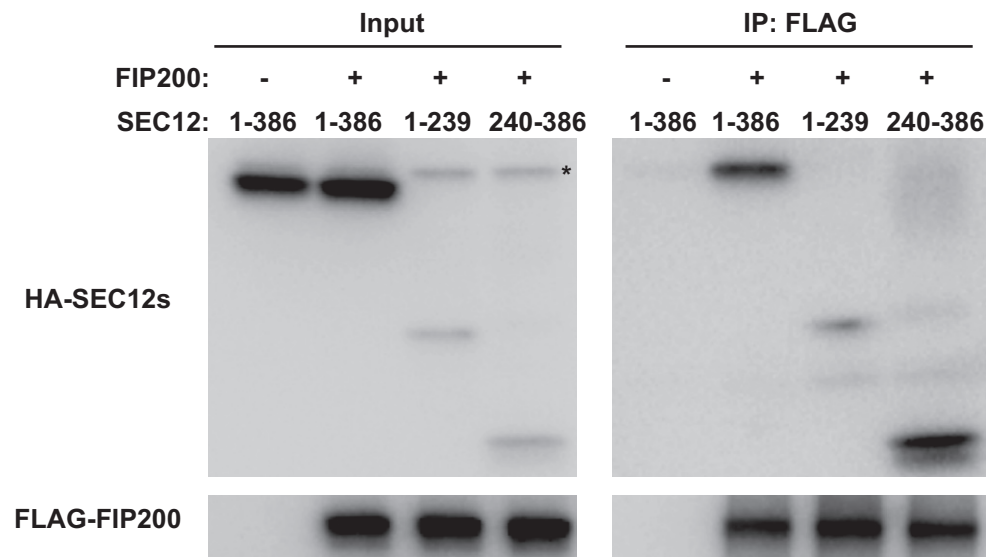

**Figure EV5. The association between SEC12 cytoplasmic domains and FIP200.**

HEK293T cells were transfected with plasmids encoding SEC12 cytoplasmic domain variants together with FLAG-FIP200. After 24 h, the cells were starved in EBSS for 1 h. Immunoprecipitation of HA-FIP200 was performed, and the levels of indicated proteins from indicated fractions were determined by immunoblot. Asterisk indicates a non-specific band.
